# Supplementary material
Source: publisher figshare collection journal article supplement (https://diabetesjournals.figshare.com/ndownloader/files/34817026)
Supplement: Supplementary file 1 [file 34817026]

## Supplemental Materials

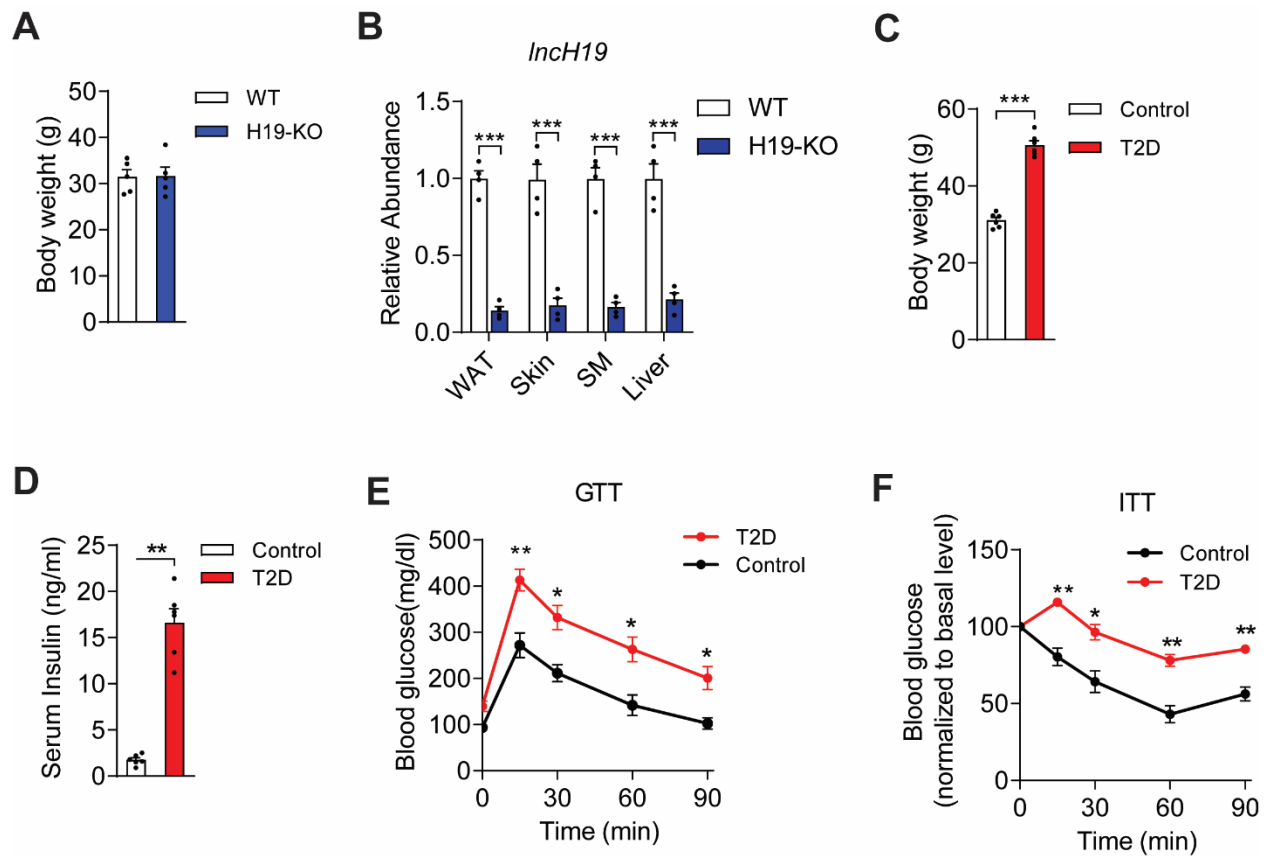

**Supplementary Fig. S1. Characterization of type 2 diabetic mice induced by HFD feeding.**

**A**, Body weight of whole body H19 knockout mice (H19-KO) and wildtype control counterparts at the age of 12 weeks.  $n=6$  for each genotype. **B**, Relative *IncH19* RNA in the tissues of white adipose tissue (WAT), skin, skeletal muscle (SM) and liver from the mice of H19KO or Control.  $n=4$  for each genotype. **C-F**, 8-week-old C57BL/6J mice were maintained on HFD for 12 weeks to induce type 2 diabetes or chow diet (CD) for Control animals as described in Figure 1D.  $n=6$  for each group. **C**, Body weight of T2D and control animals. **D**, Serum insulin levels of 4hr-fasting mice were determined by ELISA. **E**, Glucose tolerance test (GTT). **F**, Insulin tolerance test (ITT). All data are shown as mean  $\pm$  SD. \*,  $p < 0.05$  \*\*,  $p < 0.01$  or \*\*\*,  $p < 0.001$  by two-tailed unpaired Student's *t*-test.

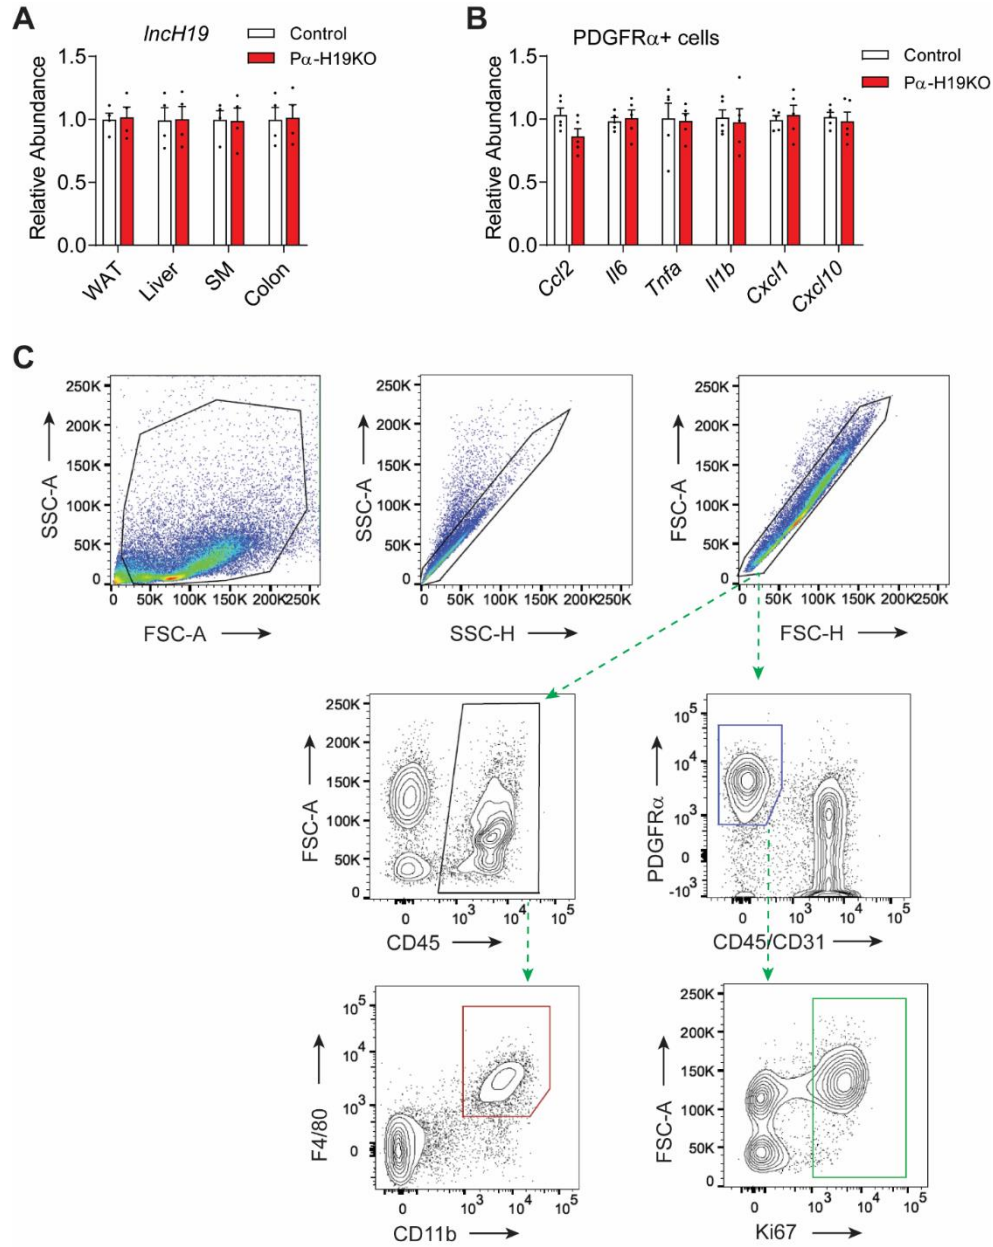

**Supplementary Fig. S2. Related to Figure 2.**

**A**, Relative *lncH19* RNA in the tissues of WAT, Liver, SM and Colon from the mice of P $\alpha$ -H19KO or Control. n=4 mice for each genotype. **B**, Relative mRNA levels of pro-inflammatory genes in PDGFR $\alpha$ <sup>+</sup> cells freshly sorted from wound-healing cutaneous tissues of P $\alpha$ -H19KO and control animals, respectively. n=5 mice for each genotype. All data are shown as mean  $\pm$  SD. **C**, Gating strategy for the detection and quantification of macrophages and Ki67<sup>+</sup> PDGFR $\alpha$ <sup>+</sup> cells in

cutaneous tissue by flow cytometry. Upon selection of live cells/single cells from stromal vascular fraction of cutaneous tissue, CD45<sup>+</sup> cells were segregated on the basis of CD11b and F4/80 expression for macrophages. Or CD45-CD31-PDGFR $\alpha$ <sup>+</sup> cells were separated on the basis of Ki67 expression.

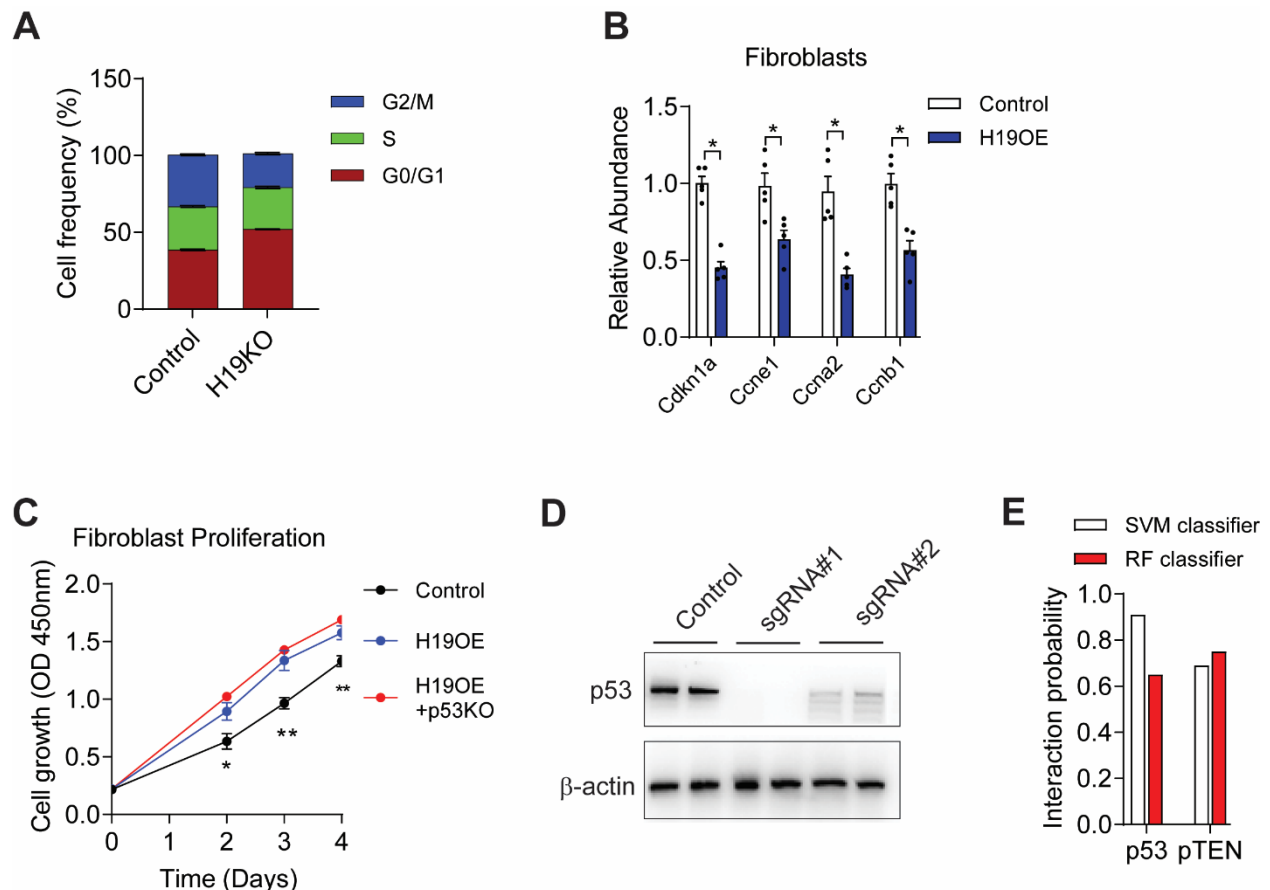

**Supplementary Fig. S3. Overexpression of *lncH19* promotes fibroblast proliferation via repressing p53 activity. (Related to Figure 3)**

**A**, Cell cycle of fibroblasts of H19KO and control animals were determined by flow cytometry. Quantification of cell percentages of G0/G1, S and G2 phases were presented. **B**, Relative mRNA levels of p53-target genes in primary dermis fibroblasts transfected with lentivirus expressing *H19*. **C**, CCK8 assays determined the growth of dermis fibroblasts *in vitro* after the transfection with lentivirus expression *lncH19* or in combination of lentivirus expressing *p53* gRNA as indicated. **D**, Immunoblotting of *p53* protein levels in fibroblasts which were transfected by lentivirus expressing gRNA#1, gRNA#2 of *p53* or control. **E**, Bioinformatics prediction of *lncH19*-interacting *p53* and *pTEN* proteins. RPISeq predictions were based on random forest (RF) or

support vector machine (SVM). For A-D, the data are shown as mean  $\pm$  SD. \*,  $p < 0.05$  \*\*,  $p < 0.01$  or \*\*\*,  $p < 0.001$  by two-tailed unpaired Student's  $t$ -test.

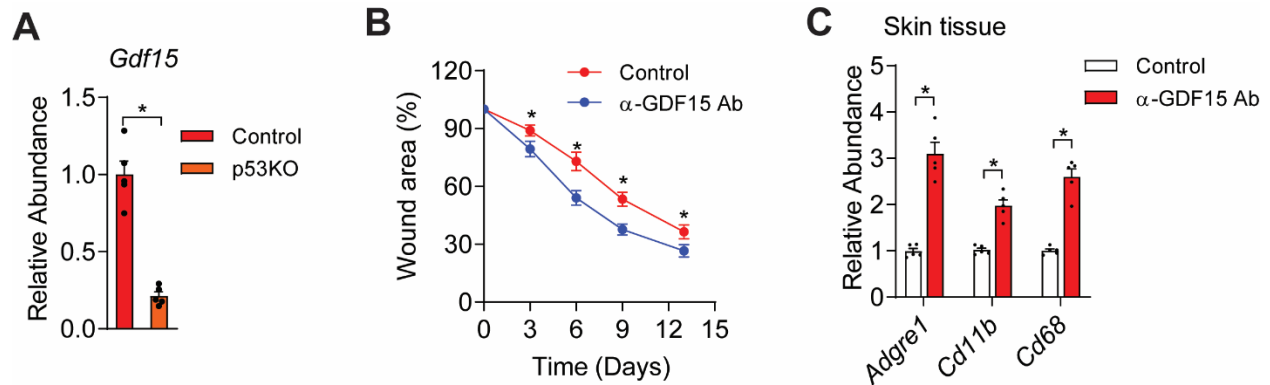

**Supplementary Fig. S4. Related to Figure 4.**

**A**, Relative *Gdf15* mRNA levels in primary H19-KO fibroblasts which were prior transfected with lentivirus expressing gRNA of p53 or control. **B**, Wound area of diabetic mice were measured at indicated time points. The mice were administered with  $\alpha$ -GDF15 Ab (10mg per kg body weight once every two days) at the second day after injury. n=5 for each genotype. **C**, Relative mRNA levels of macrophage-selective marker genes in wound-healing cutaneous tissues of P $\alpha$ -H19KO mice which were treated by  $\alpha$ -GDF15 Ab (5mg per kg body weight once every day) at the second day after injury. (n=5 each genotype). All the data are shown as mean  $\pm$  SD. \*,  $p < 0.05$  \*\*,  $p < 0.01$  by two-tailed unpaired Student's *t*-test.

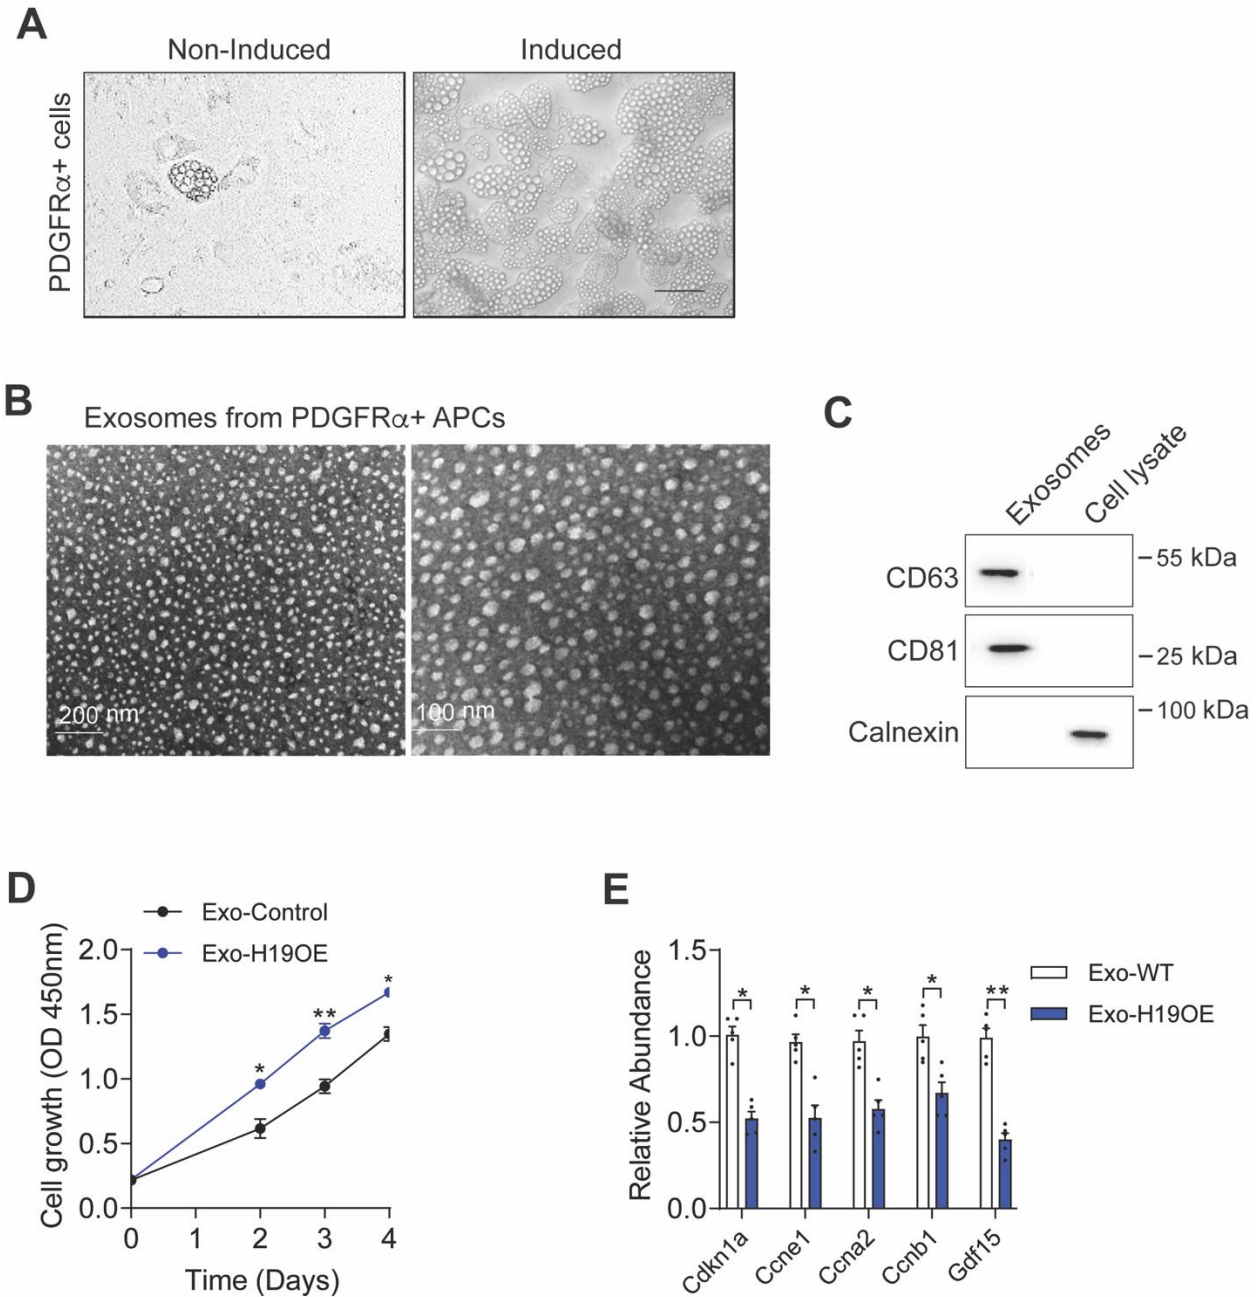

**Supplementary Fig. S5. Characterization of scWAT APC-derived exosomes and exosomes derived from H19-overexpressed APCs promote the proliferation of dermis fibroblasts.**

**A**, Representative brightfield images of PDGFR $\alpha$ + Sca1+ APCs from scWAT maintained in ordinary growth media (Non-induced) or adipogenesis-induced media (Induced) for 8 days. Scar bar is 20  $\mu$ m. **B**, Representative images of the ultrastructure of APC-derived exosomes by

transmission electron microscopy. Scar bar is 200nm for the left image and 100nm for the right image. **C**, Immunoblotting analyses of the exosome makers (CD63, CD81) and intracellular protein marker (Calnexin) in the samples of exosomes and cell lysate. **D**, CCK8 assays determined the growth of dermis fibroblasts *in vitro* in the presence of indicated exosomes. **E**, Relative mRNA levels of p53-target genes in primary dermis fibroblasts with the presence of indicated exosomes. For **D,E**, exosomes were isolated from the APCs which were prior transfected with lentivirus expressing *lncH19* or control. The data are shown as mean  $\pm$  SD. \*,  $p < 0.05$  \*\*,  $p < 0.01$  by two-tailed unpaired Student's *t*-test.



**Supplemental Table 1. Primer sequences.**

|       | Primer sequences for qPCR |                           |                             |
|-------|---------------------------|---------------------------|-----------------------------|
|       | Gene                      | Forward (5' -3')          | Reverse (5' -3')            |
| Mouse | <i>Ccl2</i>               | CCACAACCACCTCAAGCACTTC    | AAGGCATCACAGTCCGAGTCAC      |
|       | <i>IncH19</i>             | GTCCGGCCTTCCTGAACACCTT    | GCTTCACCTTCCAGAGCCGAT       |
|       | <i>Il1b</i>               | GCAACTGTTCTGAACTCAACT     | ATCTTTTGGGGTCCGTCAACT       |
|       | <i>Il6</i>                | AAGCCAGAGTCCTTCAGAGAGA    | ACTCCTTCTGTGACTCCAGCTT      |
|       | <i>Rps18</i>              | CATGCAAACCCACGACAGTA      | CCTCACGCAGCTTGTTGTCTA       |
|       | <i>Tnfa</i>               | GAAAGGGGATTATGGCTCAGG     | TCACTGTCCCAGCATCTTGTG       |
|       | <i>U1</i>                 | GGGAGATACCATGATCAC GAAGGT | CCACAAATTATGCAGT CGAGTTTCCC |
|       | <i>Mrc1</i>               | GTTACACTGGAGTGATGG TTCTC  | AGGACATGCCAGGGTC ACCTTT     |
|       | <i>Il10</i>               | CGGGAAGACAATAACTG CACCC   | CGGTTAGCAGTATGTT GTCCAGC    |
|       | <i>Adgre1</i>             | ATGGACAAACCAACTTTCAAGGC   | GCAGACTGAGTTAGGACCACAA      |
|       | <i>Cd11b</i>              | CCATGACCTTCCAAGAGAATGC    | ACCGGCTTGTGCTGTAGTC         |
|       | <i>Cd68</i>               | CCATCCTTCACGATGACACCT     | GGCAGGGTTATGAGTGACAGTT      |
|       | <i>Gdf15</i>              | CTGGCAATGCCTGAACAACG      | GGTCGGGACTTGTTCTGAG         |
|       | <i>p53</i>                | CTCTCCCCCGCAAAGAAAAA      | CGGAACATCTCGAAGCGTTTA       |
|       | <i>Cdkn1a</i>             | CCTGGTGATGTCCGACCTG       | CCATGAGCGCATCGCAATC         |
|       | <i>Ccne1</i>              | GTGGCTCCGACCTTTCAGTC      | CACAGTCTTGTCATCTTGGCA       |
|       | <i>Ccna2</i>              | GCCTTCACCATTGATGTGGAT     | TTGCTGCGGGTAAAGAGACAG       |
|       | <i>Ccnb1</i>              | AAGGTGCCTGTGTGTGAACC      | GTCAGCCCCATCATCTGCG         |
|       |                           |                           |                             |
| Human | hLNCH19                   | GACATCTGGAGTCTGGCAGG      | CTGCCACGTCCTGTAACCAA        |
|       | hP53                      | CAGCACATGACGGAGGTTGT      | TCATCCAAATACTCCACACGC       |
|       | hRPS18                    | GCGGCGGAAAATAGCCTTTG      | GATCACACGTTCCACCTCATC       |
